# Supplementary material for: Assessment of the Utility of Whole Genome Sequencing of Measles Virus in the Characterisation of Outbreaks
Source: PubMed Central journal article supplement (PMC4646484; doi:10.1371/journal.pone.0143081), 2015-11-16
Supplement: pone.0143081.s004.pdf [file pone.0143081.s004.pdf]

**S1 Table. Samples selected for this study.**

GenBank accession numbers are provided for samples for which the whole genome sequence excluding the 3' and 5' termini (WGS-t) is available. When a WHO named strain with identical N-450 sequence has been identified, this is indicated.

| Genotype | WHOname                            | Material     | WHO named strain              | GenBank  |
|----------|------------------------------------|--------------|-------------------------------|----------|
| B3       | MVs/Manchester.GBR/7.12/2          | Cell culture | MVs/Liverpool.GBR/5.12/       | KT732214 |
| B3       | MVi/Manchester.GBR/31.13/          | Cell culture | n/d                           | KT732215 |
| B3       | MVs/Newcastle upon Tyne.GBR/35.13/ | Oral fluid   | MVi/Harare.ZWE/38.09/         | KT732216 |
| B3       | MVs/London.GBR/41.13/              | Cell culture | MVi/Harare.ZWE/38.09/         | KT732217 |
| B3       | MVs/Dartford.GBR/2.14/             | Oral fluid   | MVi/Harare.ZWE/38.09/         | KT732218 |
| B3       | MVs/London.GBR/3.14/               | Oral fluid   | MVi/Harare.ZWE/38.09/         | KT732219 |
| B3       | MVs/London.GBR/3.14/2              | Oral fluid   | n/d                           | KT732220 |
| B3       | MVs/London.GBR/3.14/3              | Oral fluid   | MVi/Harare.ZWE/38.09/         | KT732221 |
| B3       | MVs/Luton.GBR/4.14/                | Oral fluid   | n/d                           | KT732222 |
| B3       | MVs/London.GBR/4.14/2              | Oral fluid   | MVi/Harare.ZWE/38.09/         | KT732223 |
| B3       | MVs/Newcastle upon Tyne.GBR/9.14/  | Oral fluid   | n/d                           | KT732224 |
| D4       | MVs/Leeds.GBR/9.11/2               | Oral fluid   | MVs/Manchester.GBR/10.09/     | n/a      |
| D4       | MVs/London.GBR/17.11/4             | Oral fluid   | MVs/Manchester.GBR/10.09/     | n/a      |
| D4       | MVs/London.GBR/19.11/5             | Oral fluid   | MVs/Manchester.GBR/10.09/     | KT732225 |
| D4       | MVs/London.GBR/20.11/2             | Oral fluid   | MVs/Manchester.GBR/10.09/     | KT732226 |
| D4       | MVs/Brighton.GBR/41.11/2           | Cell culture | MVs/Manchester.GBR/10.09/     | n/a      |
| D4       | MVs/Brighton.GBR/44.11             | Cell culture | MVs/Manchester.GBR/10.09/     | n/a      |
| D4       | MVs/Brighton.GBR/49.11             | Cell culture | MVs/Manchester.GBR/10.09/     | KT732227 |
| D4       | MVs/Brighton.GBR/12.12/7           | Oral fluid   | MVs/Manchester.GBR/10.09/     | KT732228 |
| D4       | MVs/London.GBR/20.12/              | Oral fluid   | MVs/Manchester.GBR/10.09/     | KT732229 |
| D4       | MVs/London.GBR/20.12/3             | Oral fluid   | MVs/Manchester.GBR/10.09/     | n/a      |
| D4       | MVs/Tonbridge.GBR/26.12/           | Oral fluid   | MVs/Manchester.GBR/10.09/     | n/a      |
| D8       | MVi/Benni Mellal.MOR/05.03/        | Cell culture | n/d                           | n/a      |
| D8       | MVs/Llandudno.GBR/6.12/            | Oral fluid   | MVi/Villupuram.IND/03.07/     | n/a      |
| D8       | MVs/Llandudno.GBR/7.12/2           | Oral fluid   | MVi/Villupuram.IND/03.07/     | KT732230 |
| D8       | MVs/Llandudno.GBR/8.12/            | Oral fluid   | MVi/Villupuram.IND/03.07/     | n/a      |
| D8       | MVs/Birmingham.GBR/17.12/          | Oral fluid   | n/d                           | n/a      |
| D8       | MVs/London.GBR/18.12/10            | Oral fluid   | n/d                           | n/a      |
| D8       | MVs/London.GBR/20.12/6             | Oral fluid   | n/d                           | n/a      |
| D8       | MVs/London.GBR/22.12/3             | Oral fluid   | n/d                           | KT732231 |
| D8       | MVs/Taunton.GBR/27.12/3            | Oral fluid   | MVs/Taunton.GBR/27.12/        | n/a      |
| D8       | MVs/London.GBR/28.12/              | Oral fluid   | MVs/Frankfurt_Main.DEU/17.11/ | KT732232 |
| D8       | MVs/Sheffield.GBR/32.12/           | Oral fluid   | MVs/Taunton.GBR/27.12/        | KT732233 |
| D8       | MVs/Sheffield.GBR/32.12/3          | Oral fluid   | MVs/Taunton.GBR/27.12/        | KT732234 |
| D8       | MVs/Coventry.GBR/40.12/            | Oral fluid   | MVs/Taunton.GBR/27.12/        | KT732235 |
| D8       | MVs/Coventry.GBR/42.12/2           | Oral fluid   | MVs/Taunton.GBR/27.12/        | KT732236 |
| D8       | MVs/Gloucester.GBR/46.12/          | Oral fluid   | MVs/Taunton.GBR/27.12/        | KT732237 |
| D8       | MVs/Gloucester.GBR/46.12/2         | Oral fluid   | MVs/Taunton.GBR/27.12/        | KT732238 |
| D8       | MVs/Crewe.GBR/46.12/               | Oral fluid   | MVs/Taunton.GBR/27.12/        | KT732239 |
| D8       | MVs/Hull.GBR/47.12                 | Cell culture | MVs/Taunton.GBR/27.12/        | KT732240 |
| D8       | MVs/Derby.GBR/47.12/               | Oral fluid   | MVs/Taunton.GBR/27.12/        | KT732241 |
| D8       | MVs/Darlington.GBR/48.12/          | Oral fluid   | MVs/Taunton.GBR/27.12/        | n/a      |
| D8       | MVs/Darlington.GBR/49.12           | Oral fluid   | MVs/Taunton.GBR/27.12/        | n/a      |
| D8       | MVs/Exeter.GBR/52.12/              | Oral fluid   | MVs/Taunton.GBR/27.12/        | KT732242 |
| D8       | MVs/Swansea.GBR/4.13/2             | Oral fluid   | MVs/Swansea.GBR/4.13/         | n/a      |
| D8       | MVs/Teesside.GBR/8.13/             | Oral fluid   | MVs/Taunton.GBR/27.12/        | n/a      |
| D8       | MVs/Swansea.GBR/9.13/              | Oral fluid   | MVs/Swansea.GBR/4.13/         | KT732245 |
| D8       | MVs/Teesside.GBR/9.13/3            | Oral fluid   | MVs/Taunton.GBR/27.12/        | KT732244 |

|    |                                    |              |                               |          |
|----|------------------------------------|--------------|-------------------------------|----------|
| D8 | MVs/Teeside.GBR/9.13/4             | Oral fluid   | MVs/Taunton.GBR/27.12/        | KT732246 |
| D8 | MVs/Teeside.GBR/9.13/5             | Oral fluid   | MVs/Taunton.GBR/27.12/        | KT732243 |
| D8 | MVs/Swansea.GBR/10.13/             | Oral fluid   | MVs/Swansea.GBR/4.13/         | KT732247 |
| D8 | MVs/Swansea.GBR/12.13/             | Oral fluid   | MVs/Swansea.GBR/4.13/         | n/a      |
| D8 | MVs/Swansea.GBR/13.13/4            | Oral fluid   | MVs/Swansea.GBR/4.13/         | KT732248 |
| D8 | MVs/Swansea.GBR/14.13/3            | Cell culture | MVs/Frankfurt_Main.DEU/17.11/ | n/a      |
| D8 | MVs/Swansea.GBR/14.13/4            | Oral fluid   | MVs/Swansea.GBR/4.13/         | KT732250 |
| D8 | MVs/Lincoln.GBR/15.13/             | Oral fluid   | MVs/Taunton.GBR/27.12/        | KT732256 |
| D8 | MVs/Swansea.GBR/15.13/             | Oral fluid   | MVs/Swansea.GBR/4.13/         | KT732249 |
| D8 | MVs/Taunton.GBR/15.13/             | Oral fluid   | MVs/Swansea.GBR/4.13/         | KT732252 |
| D8 | MVs/Ipswich.GBR/16.13/             | Oral fluid   | MVs/Taunton.GBR/27.12/        | n/a      |
| D8 | MVs/Newcastle upon Tyne.GBR/16.13/ | Oral fluid   | MVs/Taunton.GBR/27.12/        | KT732254 |
| D8 | MVs/Shrewsbury.GBR/16.13/          | Oral fluid   | MVs/Frankfurt_Main.DEU/17.11/ | n/a      |
| D8 | MVs/Swansea.GBR/16.13/2            | Oral fluid   | MVs/Swansea.GBR/4.13/         | KT732251 |
| D8 | MVs/Swansea.GBR/16.13/5            | Oral fluid   | MVs/Swansea.GBR/4.13/         | KT732255 |
| D8 | MVs/Swansea.GBR/16.13/6            | Oral fluid   | MVs/Swansea.GBR/4.13/         | n/a      |
| D8 | MVs/Teeside.GBR/16.13/6            | Oral fluid   | MVs/Taunton.GBR/27.12/        | KT732253 |
| D8 | MVs/Teeside.GBR/16.13/8            | Oral fluid   | MVs/Taunton.GBR/27.12/        | n/a      |
| D8 | MVs/Shrewsbury.GBR/17.13/          | Oral fluid   | MVs/Frankfurt_Main.DEU/17.11/ | n/a      |
| D8 | MVs/Swansea.GBR/17.13/9            | Oral fluid   | MVs/Swansea.GBR/4.13/         | KT732257 |
| D8 | MVs/Teeside.GBR/18.13/2            | Oral fluid   | MVs/Taunton.GBR/27.12/        | KT732258 |
| D8 | MVs/London.GBR/19.13/              | Oral fluid   | MVs/Taunton.GBR/27.12/        | n/a      |
| D8 | MVs/London.GBR/20.13/2             | Cell culture | MVs/Taunton.GBR/27.12/        | KT732260 |
| D8 | MVs/London.GBR/21.13/              | Oral fluid   | MVs/Taunton.GBR/27.12/        | KT732259 |
| D8 | MVs/Manchester.GBR/30.13/          | Cell culture | MVs/Taunton.GBR/27.12/        | KT732261 |

n/d: no WHO named strain has been defined for this N-450 sequence.

n/a: the WGS-t was not obtained for this strain.
