# Supplementary material for: Assessment of the Utility of Whole Genome Sequencing of Measles Virus in the Characterisation of Outbreaks
Source: PubMed Central journal article supplement (PMC4646484; doi:10.1371/journal.pone.0143081), 2015-11-16
Supplement: pone.0143081.s005.pdf [file pone.0143081.s005.pdf]

**S2 Table. Primers used for PCR enrichment.**

| <b>Name</b>            | <b>Sequence (5' &gt; 3')</b> |
|------------------------|------------------------------|
| MeV-L1-3F              | TTGGGTAAGGATAGATCAATCAATG    |
| MeV-L1-3R              | CTTGTTCTGAATTGAGTTCTCCAGG    |
| MeV-L2-1F              | GACATTGATACATATATCGTAGAGG    |
| MeV-L2-1R              | TTGACATGGCGTGCCTGC           |
| MeV-L3-1F              | TCTAGACTAGGTGCRAGRGGCCG      |
| MeV-L3-1R              | AGATTGTGGTACCAGATTCGGGTG     |
| MeV-L4-1F              | GAGACACCCATTA AAAAGGGC       |
| MeV-L4-1R              | GTCGAAGTCGTAGATCTCTG         |
| MeV-L5-1F              | CCTGATGACTCTCCTTGATG         |
| MeV-L5-1R              | CATCAGTGGGTAACATAAGGTC       |
| MeV-L6-2F              | CGGGAACCTCAGGAGAAAG          |
| MeV-L6-3R              | CCCCCGTCTTGAYTGTCG           |
| MeV-L7nF <sup>1</sup>  | AGACCACCAACCGCATCCC          |
| MeV-L7nR <sup>1</sup>  | GGCTCGCTCTCAGATTGTCG         |
| MeV-L7-1F <sup>2</sup> | CGCACAAGCGACCGAGGTG          |
| MeV-L7-3R <sup>2</sup> | CTAGGGCCGCACCTGCCAG          |
| MeV-L8-1F              | TGACTCGTTCAGCCATCAATC        |
| MeV-L8-1R              | CACAATTGGCTATTAGGTTCCC       |
| MeV-L9-1F              | TTCATGCCAGAGGGGACTGTG        |
| MeV-L9-1R              | CGATCAAGCTCAGAAACATGACG      |
| MeV-L10-1F             | CAACGAGACCGGATAAATGC         |
| MeV-L10-1R             | CATGTCGGTTGGGGATTTC          |
| MeV-L11-1F             | GAGTGTTTGARGTAGGTGTTATCAG    |
| MeV-L11-1R             | AGCACACAGAAGTGACGGCAC        |
| MeV-L12-1F             | TGGCAACCTACGATACYTCCAG       |
| MeV-L12-1R             | ACAAGGTCACGAGAGATTAGC        |
| MeV-L13-1F             | AACTCACGGCTTGGCCTAG          |
| MeV-L13-1R             | CTTGGGAGGGTCGTAACGC          |
| MeV-L14-1F             | GCACGGAGGCAGTTGGCC           |
| MeV-L14-1R             | GGAATGGTGCTGATGGTCC          |
| MeV-L15-1F             | TGCCTTAATTGGAGATATGAGACC     |
| MeV-L15-1R             | GCAGTTATGTTCTTGAGGAGTC       |
| MeV-L16-2F             | CAGAAACATCGGTGATCCAGTAAC     |
| MeV-L16-1R             | GGAGTGATCACCTTAGCTC          |
| MeV-L17-1F             | TGAGAGAACAGACATGAAGCTTG      |
| MeV-L17-1R             | CATTGACAAGCACCTTAAACTC       |
| MeV-L18-1F             | AAGGACCATATGAATGAAATTTTCAG   |
| MeV-L18-4R             | AAGAACAAGCCGTCTTCCC          |
| MeV-L19-1F             | CATGCTTTCCGCAGAATCGGG        |
| MeV-L19-1R             | TTGAATCTTGCCAACTCCCTGTAG     |
| MeV-L20-1F             | AGGTGATATCAACCCTACTCTG       |
| MeV-L20-1R             | CCAGACAAAGCTGGGAATAG         |

<sup>1</sup> first PCR round

<sup>2</sup> second PCR round
